# Supplementary material
Source: PubMed Central journal article supplement (PMC3148729)
Supplement: JCI44945sd.pdf [file JCI44945sd.pdf]

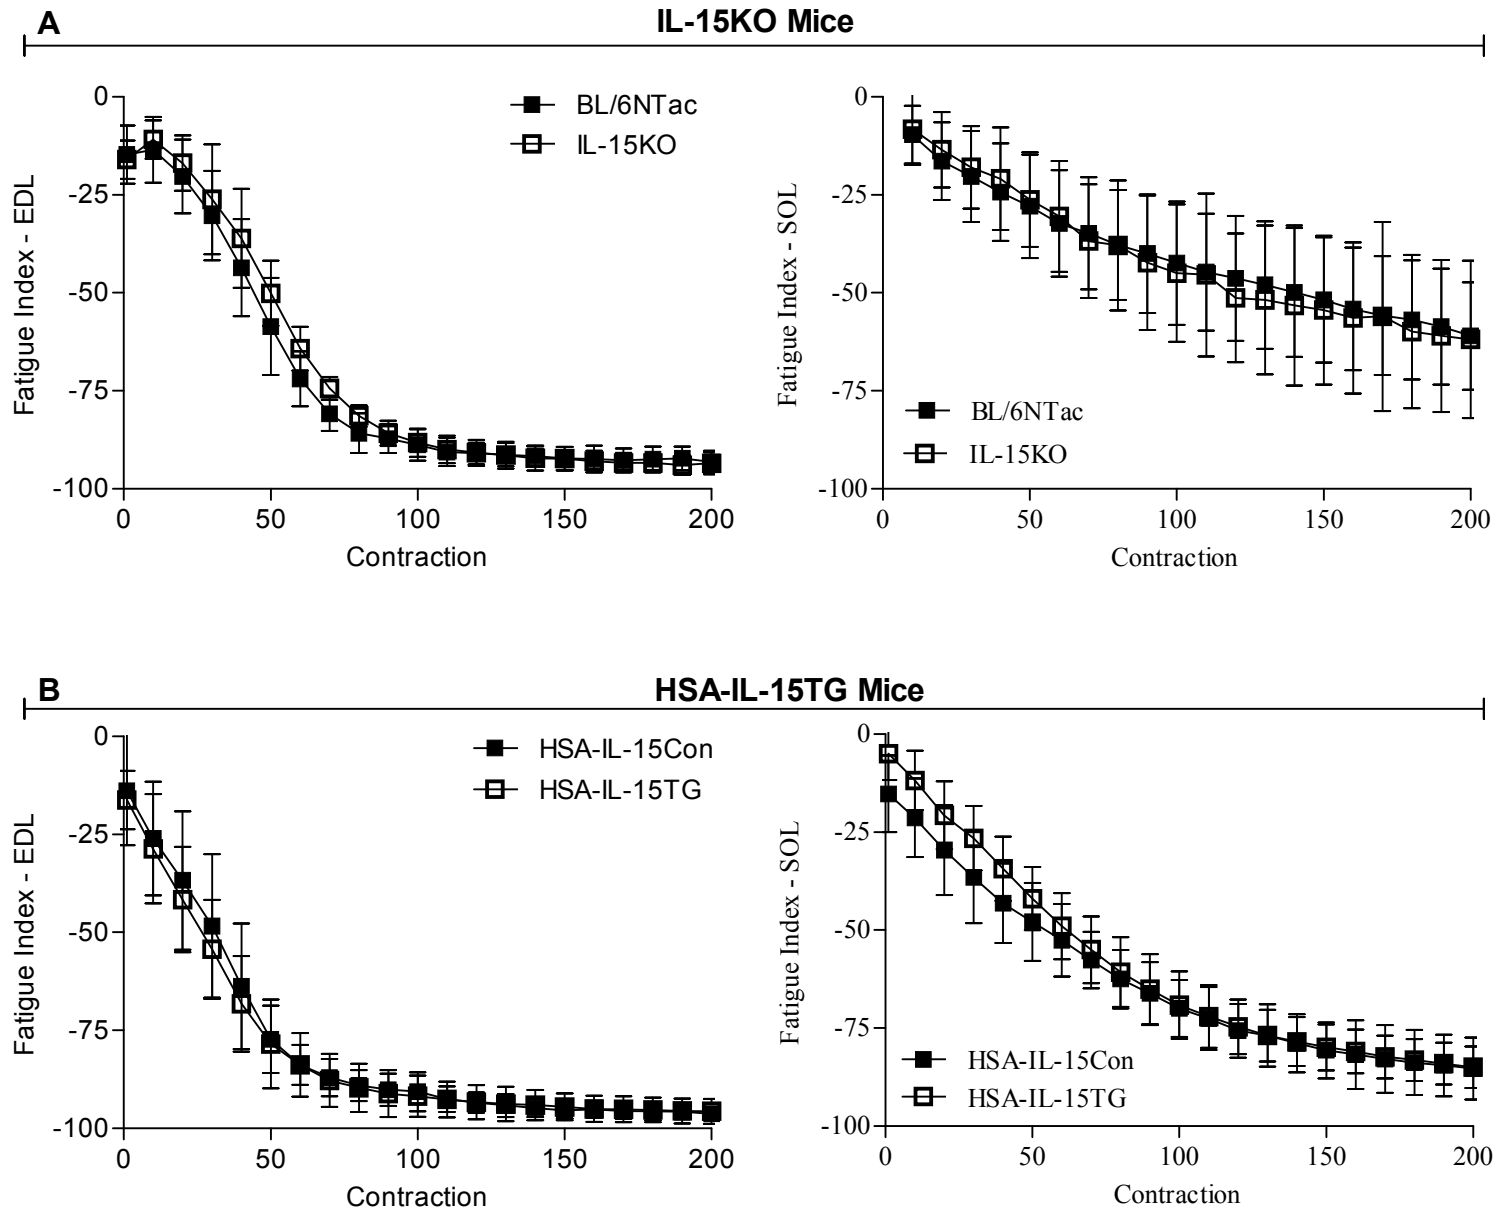

**Supplementary Figure 1: Fatigue curves in EDL and soleus muscles from IL-15KO and HSA-IL-15TG mice.** A repeated stimulation protocol was performed to determine the fatigue characteristics of EDL and soleus muscles. Muscles were stimulated for 330ms every second for 6-minutes, and the fatigue index was calculated as the percent difference in tetanic force between the first contraction and each subsequent contraction. No differences were observed in the fatigue properties of EDL or soleus muscles from IL-15KO mice (A) or HSA-IL-15TG mice (B). Data presented as Mean  $\pm$  SD.

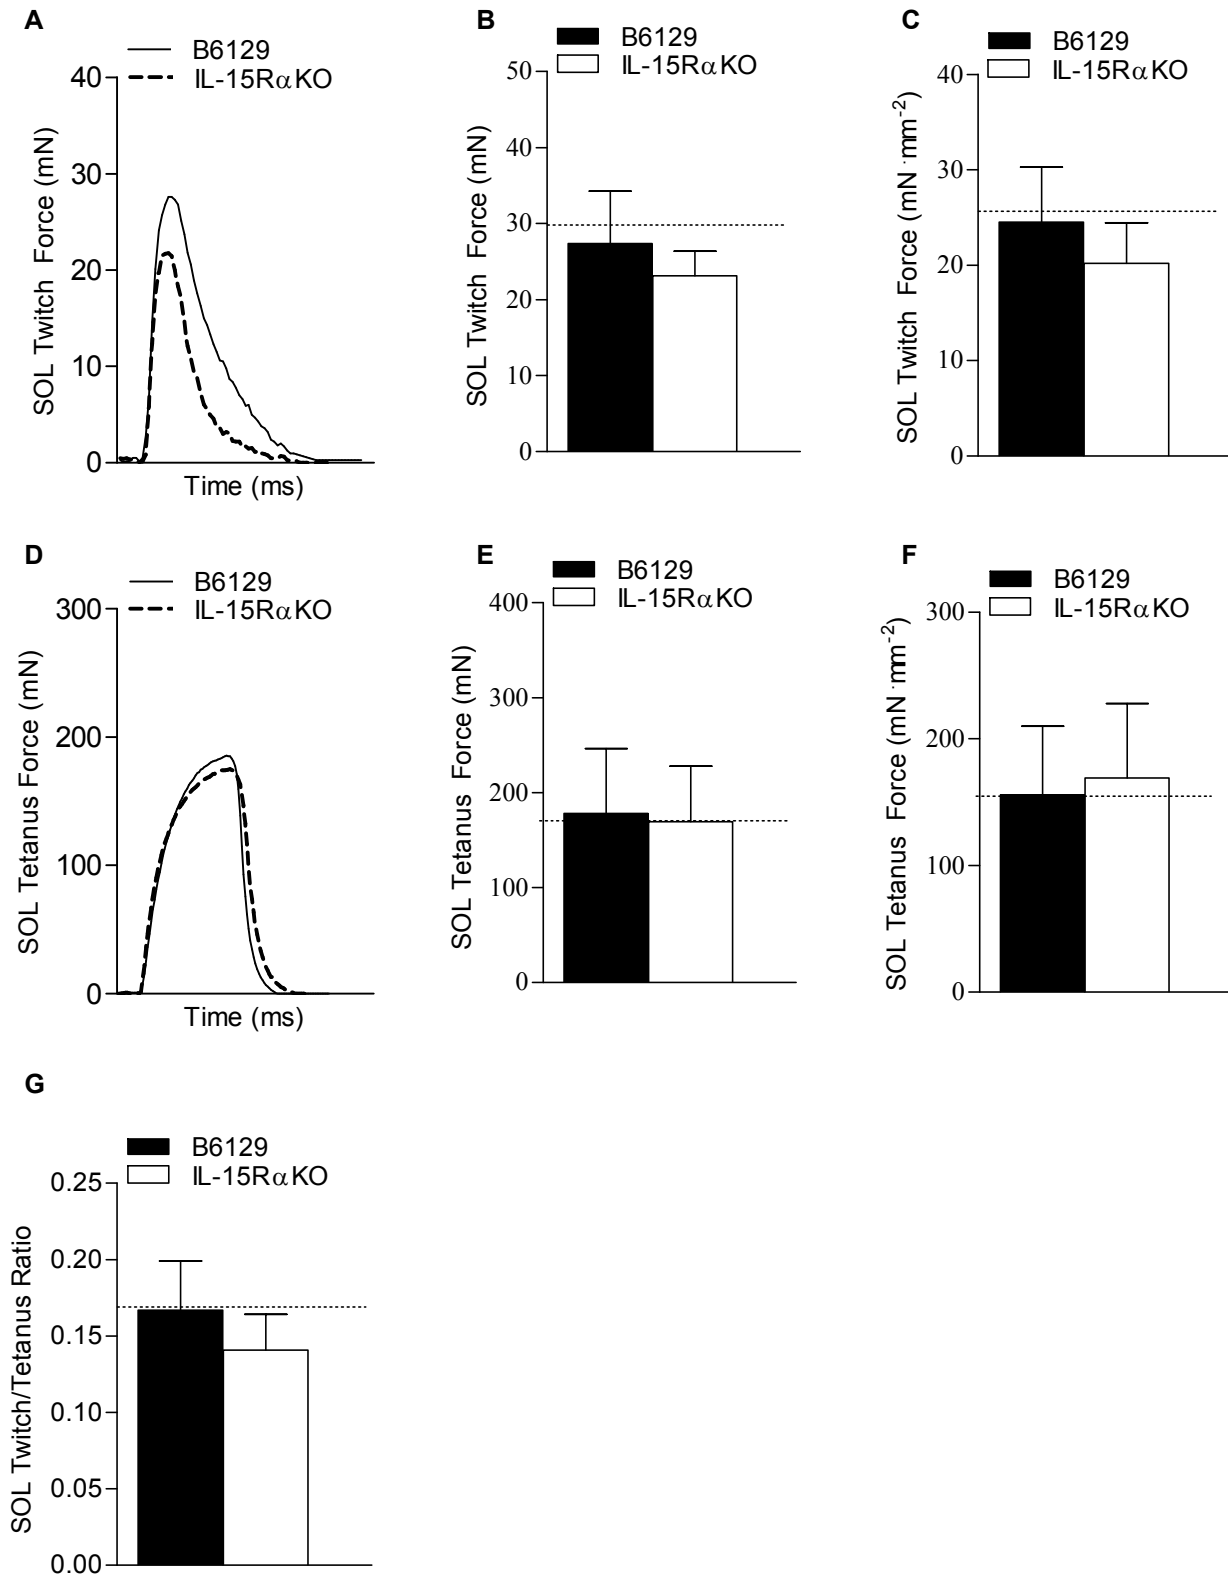

**Supplementary Figure 2: Isometric force production and resistance to fatigue in soleus muscles.** The soleus muscles from IL-15R $\alpha$ KO mice and B6129 control mice were stimulated *ex vivo* to quantify isometric force production and fatigue properties. **(A)** Representative twitch contraction force traces. **(B)** Absolute twitch force. **(C)** Normalized twitch force. **(D)** Representative tetanic contraction traces. **(E)** Absolute tetanic force. **(F)** Normalized tetanic force. **(G)** The twitch/tetanus ratio. Dotted lines represent values for wild-type C57BL/6 mice. Data are presented as Mean  $\pm$  SD.

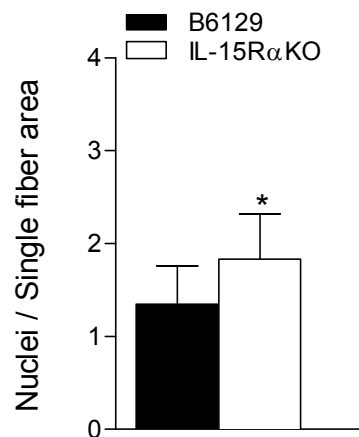

B6129

IL-15R $\alpha$ KO

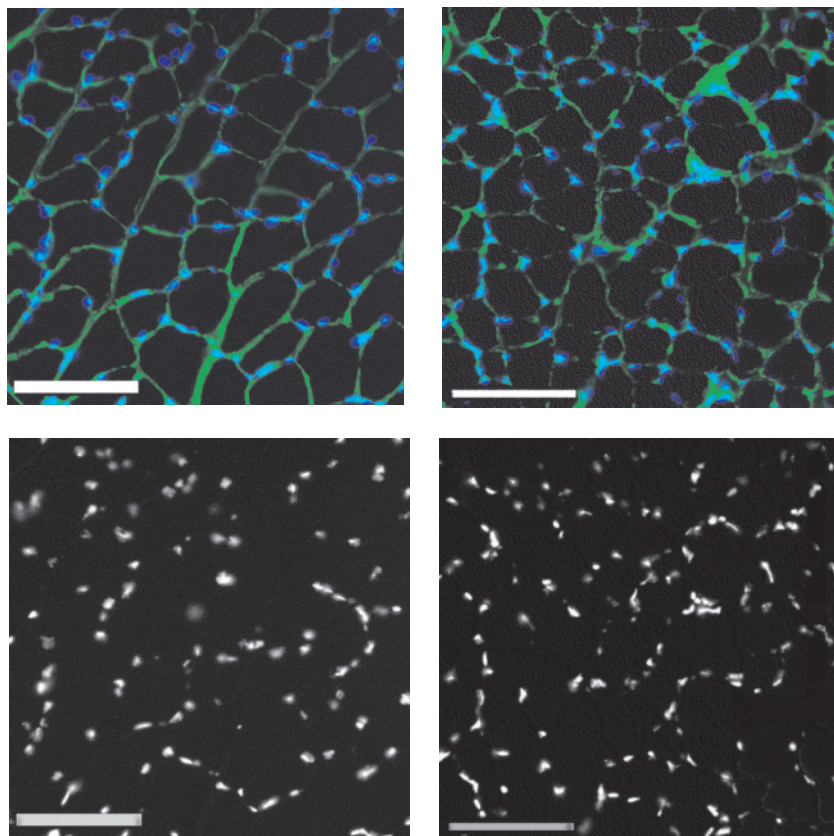

**Supplementary Figure 3: The nuclei/single fiber CSA ratio in EDL muscles from IL-15R $\alpha$ KO mice.** The total number of nuclei in EDL muscles from B6129 and IL-15R $\alpha$ KO mice were quantified from Dapi stained sections, and expressed relative to the average single fiber CSA. The ratio was significantly greater in EDL muscles from IL-15R $\alpha$ KO mice, consistent with a remodeling of these muscles to a slower, more oxidative phenotype. Scale bars represent 100 $\mu$ m. \*. Data presented as Mean  $\pm$  SD,  $p < 0.05$ .

**Supplementary Table 1: *IL15RA* SNP Associations with Athlete Status**

| Sport              | Endurance/<br>Sprint | Gender | Total | AA        |    | AC        |     | CC        |    | P value       | A allele<br>% | C allele<br>% | P value       |
|--------------------|----------------------|--------|-------|-----------|----|-----------|-----|-----------|----|---------------|---------------|---------------|---------------|
|                    |                      |        |       | %         | n  | %         | n   | %         | n  |               |               |               |               |
| ATHLETES           | Both                 | M&F    | 209   | <b>24</b> | 51 | <b>55</b> | 114 | <b>21</b> | 44 | NS            | <b>52</b>     | <b>48</b>     | NS            |
| ATHLETES           | Both                 | F      | 64    | <b>20</b> | 13 | <b>58</b> | 37  | <b>22</b> | 14 | NS            | <b>49</b>     | <b>51</b>     | NS            |
| ATHLETES           | Both                 | M      | 145   | <b>26</b> | 38 | <b>53</b> | 77  | <b>21</b> | 30 | NS            | <b>52</b>     | <b>47</b>     | NS            |
| CONTROLS           | -                    | M&F    | 258   | <b>24</b> | 63 | <b>49</b> | 127 | <b>26</b> | 68 | NS            | <b>49</b>     | <b>51</b>     | NS            |
| Endurance Athletes | Endurance            | M&F    | 125   | <b>26</b> | 33 | <b>50</b> | 63  | <b>23</b> | 29 | NS            | <b>52</b>     | <b>48</b>     | NS            |
| Endurance Athletes | Endurance            | F      | 38    | <b>21</b> | 8  | <b>53</b> | 20  | <b>26</b> | 10 | NS            | <b>47</b>     | <b>53</b>     | NS            |
| Endurance Athletes | Endurance            | M      | 87    | <b>29</b> | 25 | <b>49</b> | 43  | <b>22</b> | 19 | NS            | <b>53</b>     | <b>47</b>     | NS            |
| Sprint Athletes    | Sprint               | M&F    | 84    | <b>21</b> | 18 | <b>61</b> | 51  | <b>18</b> | 15 | NS            | <b>52</b>     | <b>48</b>     | NS            |
| Sprint Athletes    | Sprint               | F      | 26    | <b>19</b> | 5  | <b>65</b> | 17  | <b>15</b> | 4  | 0.071         | <b>52</b>     | <b>48</b>     | NS            |
| Sprint Athletes    | Sprint               | M      | 58    | <b>22</b> | 13 | <b>59</b> | 34  | <b>19</b> | 11 | NS            | <b>52</b>     | <b>48</b>     | NS            |
| Track and field    | Endurance            | M&F    | 20    | <b>30</b> | 6  | <b>60</b> | 12  | <b>10</b> | 2  | NS            | <b>60</b>     | <b>40</b>     | NS            |
| Track and field    | Sprint               | M&F    | 37    | <b>19</b> | 7  | <b>54</b> | 20  | <b>27</b> | 10 | NS            | <b>46</b>     | <b>54</b>     | NS            |
| Track and field    | Both                 | M&F    | 57    | <b>23</b> | 13 | <b>56</b> | 32  | <b>21</b> | 12 | NS            | <b>51</b>     | <b>49</b>     | NS            |
| All Cycling        | Both                 | M&F    | 73    | <b>29</b> | 21 | <b>59</b> | 43  | <b>12</b> | 9  | <i>0.052</i>  | <b>58</b>     | <b>42</b>     | <i>0.027*</i> |
| All Cycling        | Endurance            | M&F    | 66    | <b>27</b> | 18 | <b>59</b> | 39  | <b>14</b> | 9  | <i>0.068</i>  | <b>57</b>     | <b>43</b>     | <i>0.067</i>  |
| Track Cycling      | Both                 | M&F    | 30    | <b>33</b> | 10 | <b>53</b> | 16  | <b>13</b> | 4  | NS            | <b>60</b>     | <b>40</b>     | <i>0.068</i>  |
| Road Cycling       | Endurance            | M&F    | 43    | <b>26</b> | 11 | <b>63</b> | 27  | <b>12</b> | 5  | <i>0.042*</i> | <b>57</b>     | <b>43</b>     | NS            |
| Swimming           | ALL                  | M&F    | 39    | <b>26</b> | 10 | <b>67</b> | 26  | <b>8</b>  | 3  | <i>0.010*</i> | <b>59</b>     | <b>41</b>     | <i>0.059</i>  |

|                           |           |     |    |           |    |           |    |            |    |               |           |            |               |
|---------------------------|-----------|-----|----|-----------|----|-----------|----|------------|----|---------------|-----------|------------|---------------|
| Surf life saving          | Endurance | M&F | 12 | <b>25</b> | 3  | <b>17</b> | 2  | <b>58</b>  | 7  | <i>0.021*</i> | <b>33</b> | <b>67</b>  | <i>0.088</i>  |
| AIS triathlon             | Endurance | M&F | 13 | <b>8</b>  | 1  | <b>31</b> | 4  | <b>62</b>  | 8  | NS            | <b>23</b> | <b>77</b>  | <i>0.005*</i> |
| X-Country skiers          | Both      | M&F | 8  | <b>50</b> | 4  | <b>50</b> | 4  | <b>0</b>   | 0  | NS            | <b>67</b> | <b>33</b>  | <i>0.022*</i> |
| Rowing                    | Both      | M&F | 64 | <b>20</b> | 13 | <b>42</b> | 27 | <b>38</b>  | 24 | NS            | <b>41</b> | <b>59</b>  | <i>0.082</i>  |
| Elite Rowing              | Both      | M&F | 26 | <b>12</b> | 3  | <b>46</b> | 12 | <b>42</b>  | 11 | NS            | <b>35</b> | <b>65</b>  | <i>0.028*</i> |
| Speed skating             | Sprint    | M&F | 14 | <b>29</b> | 4  | <b>64</b> | 9  | <b>7</b>   | 1  | NS            | <b>61</b> | <b>39</b>  | NS            |
| Judo                      | Sprint    | M&F | 2  | <b>0</b>  | 0  | <b>0</b>  | 0  | <b>100</b> | 2  | NS            | <b>0</b>  | <b>100</b> | NS            |
| Time within 15% of winner | Ironman   | M   | 34 | <b>24</b> | 8  | <b>65</b> | 22 | <b>12</b>  | 4  | NS            | <b>56</b> | <b>44</b>  | <i>0.042*</i> |
| Time within 10% winner    | Ironman   | M   | 18 | <b>28</b> | 5  | <b>61</b> | 11 | <b>11</b>  | 2  | NS            | <b>58</b> | <b>42</b>  | NS            |
| Time Sub9 hours           | Ironman   | M   | 12 | <b>25</b> | 3  | <b>58</b> | 7  | <b>17</b>  | 2  | NS            | <b>54</b> | <b>46</b>  | NS            |
